# Supplementary material for: One-step nanocasting synthesis of nitrogen and phosphorus dual heteroatom doped ordered mesoporous carbons for supercapacitor application
Source: Royal Society of Chemistry journal article supplement (doi:10.1039/c6ra22728g), 2016-01-01
Supplement: c6ra22728g1.pdf [file c6ra22728g1.pdf]

## **Electronic Supplementary Information**

### **One-step nanocasting synthesis of nitrogen and phosphorus dual heteroatom doped ordered mesoporous carbons for supercapacitor application**

**Jian Feng, Weiming Song\*, Li Sun, Liyang Xu**

College of Chemistry and Chemical Engineering

Qiqihar University

Qiqihar 161006, China

Phone: +86-13946276869

E-mail: [qidasongweiming@163.com](mailto:qidasongweiming@163.com)

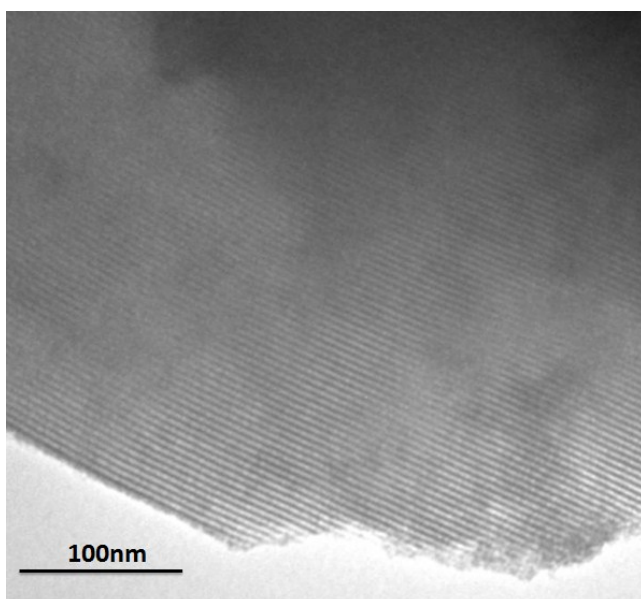

Fig. S1 TEM image for SBA-15 silica template.

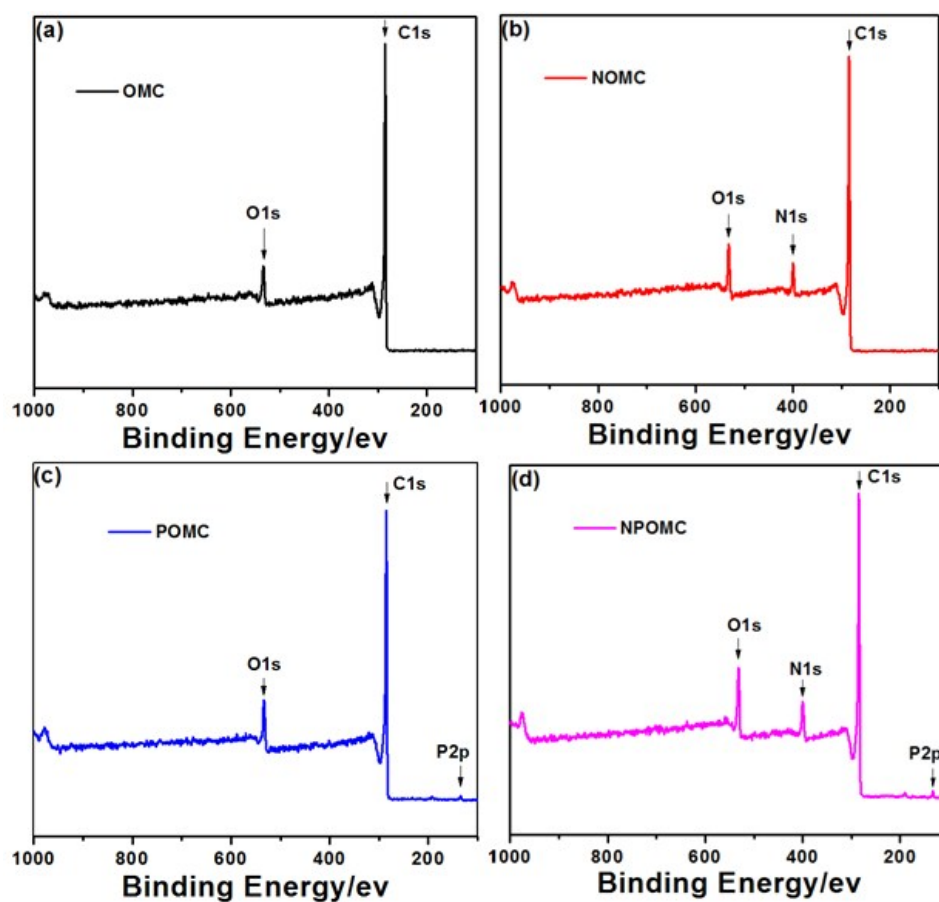

Fig. S2 XPS survey spectra of synthesized OMC samples.

**Table S1** Amounts of precursor and template materials utilized in the synthesis of OMC samples, and electrochemical performances of OMC samples.

| Sample name | Amount of SBA-15 silica template (g) | Amount of precursor (g) |           |                 | phase angle at 10 mHz (°) | Specific capacitance at 1 A g <sup>-1</sup> (F g <sup>-1</sup> ) |
|-------------|--------------------------------------|-------------------------|-----------|-----------------|---------------------------|------------------------------------------------------------------|
|             |                                      | Sucrose                 | Cyanamide | Phosphoric acid |                           |                                                                  |
| OMC         | 1.0                                  | 1.4                     | 0         | 0               | 86.2                      | 113                                                              |
| NOMC        | 1.0                                  | 1.1                     | 0.3       | 0               | 84.3                      | 176                                                              |
| POMC        | 1.0                                  | 1.1                     | 0         | 0.3             | 82.7                      | 184                                                              |
| NPOMC       | 1.0                                  | 1.0                     | 0.2       | 0.2             | 81.5                      | 220                                                              |
